# Supplementary material for: Ultrasmall silicon nanoparticles as a promising platform for multimodal imaging
Source: Royal Society of Chemistry journal article supplement (doi:10.1039/c9fd00091g), 2019-10-11
Supplement: c9fd00091g1.pdf [file c9fd00091g1.pdf]

## SUPPLEMENTARY INFORMATION

### Ultrasmall silicon nanoparticles as a promising platform for multimodal imaging

Garima Singh<sup>a</sup>, John L. Z. Ddungu<sup>b,c</sup>, Nadia Licciardello<sup>a#</sup>, Ralf Bergmann<sup>a</sup>, Luisa De Cola<sup>b,c\*</sup>, Holger Stephan<sup>a\*</sup>

<sup>a</sup>Institute of Radiopharmaceutical Cancer Research, Helmholtz-Zentrum Dresden - Rossendorf, Bautzner Landstraße 400, Dresden, D-01328, Germany

<sup>b</sup>Laboratoire de Chimie et des Biomatériaux Supramoléculaires, Institut de Science et d'Ingénierie Supramoléculaires (ISIS), 8 allée Gaspard Monge, Strasbourg, 67000, France

<sup>c</sup>Institut für Nanotechnologie (INT), Karlsruher Institut für Technologie (KIT) Campus North, Hermann-von-Helmholtz-Platz 1, Eggenstein-Leopoldshafen, 76344, Germany

<sup>#</sup>Current address: International Iberian Nanotechnology Laboratory, Avenida Mestre José Veiga s/n, 4715-330 Braga, Portugal

#### Corresponding authors:

Dr. Holger Stephan, Helmholtz-Zentrum Dresden - Rossendorf, Institute of Radiopharmaceutical Cancer Research, Bautzner Landstrasse 400, 01328 Dresden, Germany, Phone: +49 3512603091, Fax: +49 3512603232, E-Mail: [h.stephan@hzdr.de](mailto:h.stephan@hzdr.de)

Prof. Luisa De Cola; Laboratoire de Chimie et des Biomatériaux Supramoléculaires, Institut de Science et d'Ingénierie Supramoléculaires (ISIS), 8 allée Gaspard Monge, Strasbourg, 67000, France, Phone: +33 368855220; Fax: +33 368855242, E-Mail: [decola@unistra.fr](mailto:decola@unistra.fr)

## Table of contents:

- Figure S1** XPS high resolution carbon scan of Si NPs with deconvolution.
- Table S1** XPS data for deconvolution of the high resolution carbon scan.
- Scheme S1** Reaction of amine terminated Si NPs with ninhydrin to form Ruhemann's purple and aldehyde terminated Si NPs in the Kaiser Test.
- Figure S2** A) UV-Vis absorption spectra of Kaiser Test solutions containing different masses of Si NPs. B) Linear fitting of absorbance values against mass of Si NPs. Spectra measured in methanol.
- Table S2** Data from the Kaiser Test to evaluate the concentration of amine groups on Si NPs (value of  $\epsilon$  calculated from earlier calibration curve with ninhydrin).
- Equation S1** Calculation for the concentration of amine groups ( $10^6$  used to account for dilution of the test solution when measuring the absorbance).
- Equation S2** Calculation of the number of amine groups per Si NPs.
- Figure S3** Complementary Radio-iTLC and fluorescence-TLC of NOTA-IR800-Si NPs. EDTA incubated  $^{64}\text{Cu(II)}$ -labelled Si NP-IR800-NOTA. (Radio-iTLC SG; Mobile phase:  $\text{NH}_4\text{OAc}:\text{MeOH}$  1:1 (v/v); [ $^{64}\text{Cu}$ ]Cu-NOTA-IR800-Si NPs  $R_f = 0$ , [ $^{64}\text{Cu}$ ]Cu-EDTA  $R_f = 1$  (left); Fluorescence TLC of NOTA-IR800-Si NPs measured under IR short channel (710 – 730 nm), RP-TLC; Mobile phase: Methanol; Si NP-IR800-NOTA  $R_f = 0$  (right).
- Figure S4** Radiometric titration curve for  $^{64}\text{Cu(II)}$  and Cu(II) labelled [ $^{64}\text{Cu}$ ]Cu-NOTA-Si NPs (left) and [ $^{64}\text{Cu}$ ]Cu-NOTA-IR800-Si NPs (right) (Experimental value:  $\sim 0.09 \mu\text{mol}$  NOTA/mg NOTA-Si NP and  $\sim 0.091 \mu\text{mol}$  NOTA/mg NOTA-IR800-Si NP).
- Figure S5** Quantification of IR800 dye present on IR800-Si NPs (left) and NOTA-IR800-Si NPs (right) by UV-Vis spectroscopy (Experimental value  $\sim 0.013 \mu\text{mol}$  IR800 dye/mg IR800-Si NP and  $\sim 0.010 \mu\text{mol}$  IR800/mg NOTA-IR800-Si NP).
- Figure S6** Effect of NOTA-Si NPs, IR800-Si NPs and NOTA-IR800-Si NPs on the viability of HEK293 cells. The cells were exposed to 1, 10, 50 and 100  $\mu\text{g}/\text{mL}$  Si NPs dispersions for 24, 48 and 72 h respectively in Dulbecco's modified eagle's medium (DMEM) supplemented with 10% fetal bovine serum (FBS) and viability was determined using MTS assay. Triton-X was used as positive control.
- Figure S7** Effect of NOTA-Si NPs, IR800-Si NPs and NOTA-IR800-Si NPs on the viability of HEK293 cells. The cells were exposed to 1, 10, 50 and 100  $\mu\text{g}/\text{mL}$  Si NPs dispersions for 24, 48 and 72 h respectively in Dulbecco's modified eagle's medium (DMEM) supplemented with 10% fetal bovine serum (FBS) and viability was determined using LDH assay. Lysis buffer for maximum LDH release was used as a positive control.

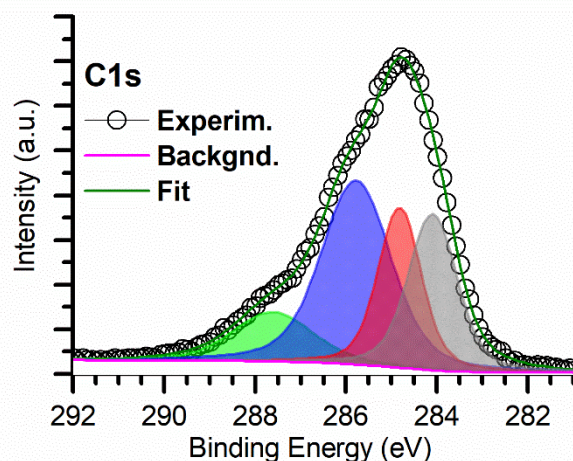

**Figure S1.** XPS high resolution carbon scan of Si NPs with deconvolution.

**Table S1.** XPS data for deconvolution of the high resolution carbon scan.

| Component | Peak BE | FWHM eV | Area (P) C | Colour |
|-----------|---------|---------|------------|--------|
| C=O       | 287.6   | 2.08    | 5356.74    | Green  |
| C—O       | 285.8   | 1.80    | 17394.01   | Blue   |
| C—C       | 284.8   | 1.13    | 9420.01    | Red    |
| C=C       | 284.1   | 1.27    | 10413.35   | Gray   |

#### Calculations for the quantification of amine groups on Si NPs' surface

**Quantification of surface amine groups.** In order to gain information on the concentration of amine groups per mass of Si NPs, the Kaiser test was employed, utilising a method similar to those employed in previous studies. Different known masses of sample are mixed and heated in separate solutions with ninhydrin reagent, which reacts with primary amine groups on the surface of the Si NPs to generate Ruhemann's purple that presents a characteristic peak in absorption spectra at 570 nm (**Scheme S1**). The quantity of this molecule is assessed by UV-Vis absorption spectroscopy to translate into the concentration of amine groups in each amount of sample.

The absorbance of each of the solutions was measured and the values at  $\lambda = 570$  nm were recorded. As shown in **Figure S2**, a linear relationship exists between the masses of Si NPs and the absorption at 570 nm in four test solutions, meaning the data has a high degree of reliability. From the data collected, an average concentration of  $4.16 \mu\text{mol NH}_2$  per mg Si NPs was estimated, which was used to calculate a value of approximately 43 amine groups per particle (**Table S2/Equations S1, S2**).

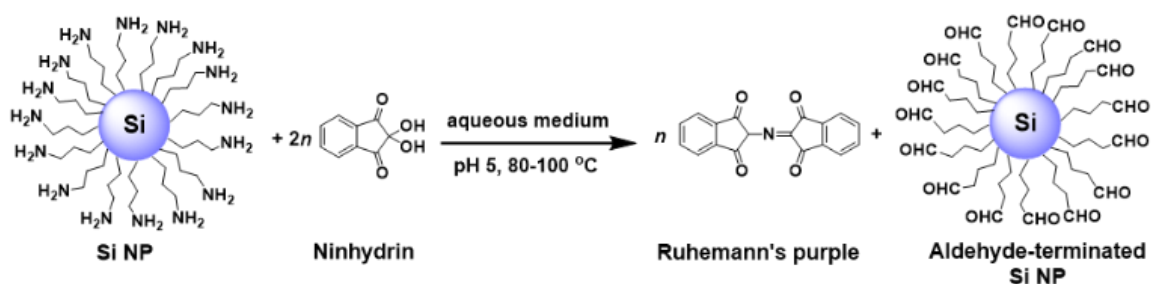

**Scheme S1.** Reaction of amine terminated Si NPs with ninhydrin to form Ruhemann's purple and aldehyde terminated Si NPs in the Kaiser Test.

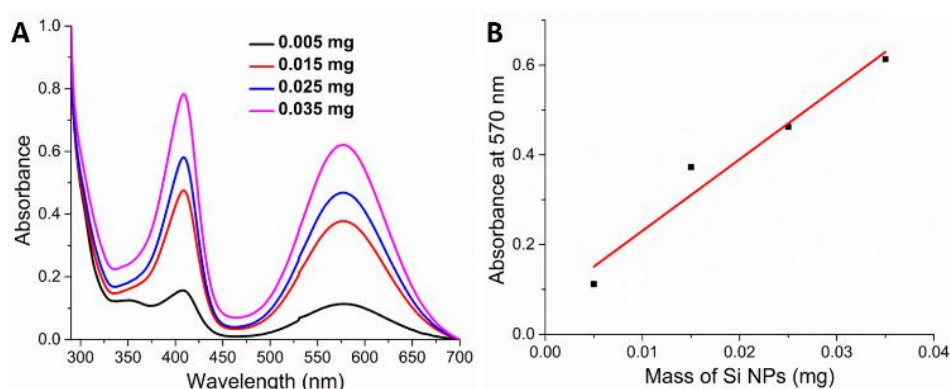

**Figure S2.** A) UV-Vis absorption spectra of Kaiser Test solutions containing different masses of Si NPs. B) Linear fitting of absorbance values against mass of Si NPs. Spectra measured in methanol.

**Table S2.** Data from the Kaiser Test to evaluate the concentration of amine groups on Si NPs (value of  $\epsilon$  calculated from earlier calibration curve with ninhydrin).

| Mass Si NPs (mg) | Absorbance ( $\lambda = 570$ nm) | Volume of test solution (ml) | $\epsilon$ ( $\text{dm}^3 \text{mol}^{-1} \text{cm}^{-1}$ ) | Concentration of amine groups ( $\mu\text{mol}/\text{mg}$ ) |
|------------------|----------------------------------|------------------------------|-------------------------------------------------------------|-------------------------------------------------------------|
| 0.005            | 0.11164                          | 0.003                        | 15000                                                       | 4.465                                                       |
| 0.015            | 0.37249                          | 0.003                        | 15000                                                       | 4.966                                                       |
| 0.025            | 0.46234                          | 0.003                        | 15000                                                       | 3.698                                                       |
| 0.035            | 0.61334                          | 0.003                        | 15000                                                       | 3.504                                                       |

**Equation S1.** Calculation for the concentration of amine groups ( $10^6$  used to account for dilution of the test solution when measuring the absorbance).

$$\text{conc. amine groups} = \frac{(\text{Abs at } \lambda = 570 \text{ nm}) \times \text{Vol} \times 10^6}{\epsilon \times \text{mass Si NPs}}$$

**Equation S2.** Calculation of the number of amine groups per Si NPs.

*Mass of SiNPs:*

*One SiNP:*

*Diameter = 2.4 nm*

*Vol (V) =  $(4/3) \pi (1.2 \times 10^{-9})^3 = 7.24 \times 10^{-27} \text{ m}^3 = 7.24 \times 10^{-21} \text{ cm}^3$*

*Density (D) = 2.33 g/cm<sup>3</sup> (silicon)*

*Mass of one NP (M = V x D) =  $1.7 \times 10^{-20} \text{ g} = 1.7 \times 10^{-17} \text{ mg} = M_{\text{SiNP}}$*

*No. Si NPs per mg =  $1/M_{\text{SiNP}} = 5.88 \times 10^{16}$*

*Mass of amine groups per mg (M = n x MW) =  $4.16 \times 10^{-6} \text{ mol} \times 16 \text{ g/mol}$*

*=  $6.7 \times 10^{-5} \text{ g} = 6.7 \times 10^{-2} \text{ mg}$*

*No. amine groups per mg =  $n \times N_A = 4.16 \times 10^{-6} \times 6.022 \times 10^{23} = 2.5 \times 10^{18}$*

*Number of amine groups per particle:*

*$5.88 \times 10^{16}$  particles per mg*

*$2.5 \times 10^{18}$  amine groups per mg*

*So amine groups per particle*

*= amine groups per mg/ particles per mg*

*= **43 amine groups per particle***

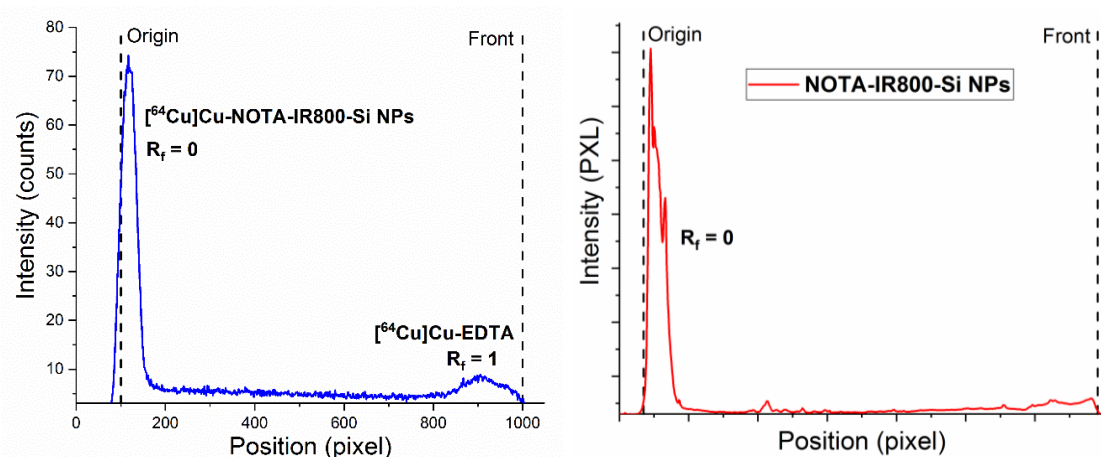

**Figure S3.** Complementary Radio-iTLC and fluorescence-TLC of NOTA-IR800-Si NPs. EDTA incubated  $^{64}\text{Cu(II)}$ -labelled Si NP-IR800-NOTA. (Radio-iTLC SG; Mobile phase:  $\text{NH}_4\text{OAc}:\text{MeOH}$  1:1 (v/v);  $^{64}\text{Cu}$ )-Cu-NOTA-IR800-Si NPs  $R_f = 0$ ,  $^{64}\text{Cu}$ )-Cu-EDTA  $R_f = 1$  (left); Fluorescence TLC of NOTA-IR800-Si NPs measured under IR short channel (710 – 730 nm), RP-TLC; Mobile phase: Methanol; Si NP-IR800-NOTA  $R_f = 0$  (right).

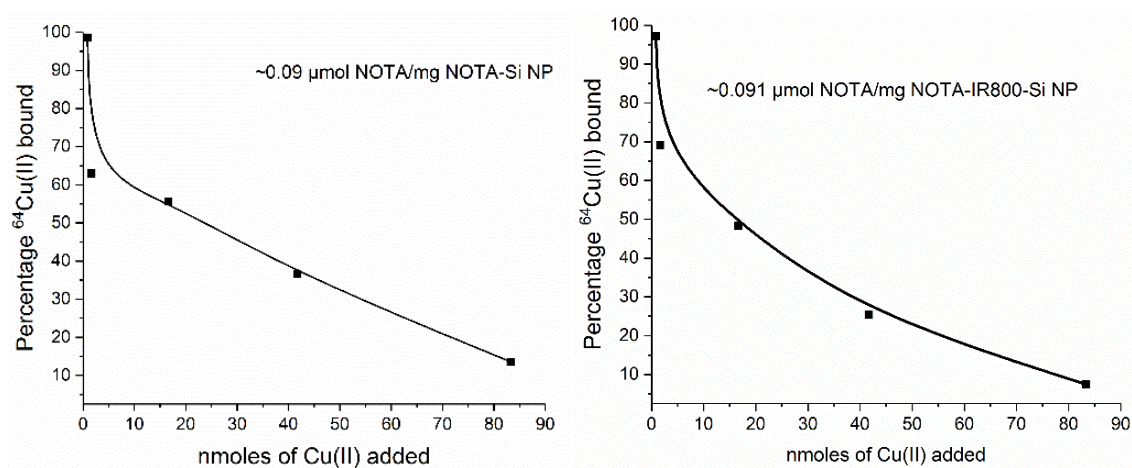

**Figure S4.** Radiometric titration curve for  $^{64}\text{Cu(II)}$  and  $\text{Cu(II)}$  labeled  $^{64}\text{Cu}$ )-Cu-NOTA-Si NPs (left) and  $^{64}\text{Cu}$ )-Cu-NOTA-IR800-Si NPs (right) (Experimental value:  $\sim 0.09 \mu\text{mol}$  NOTA/mg NOTA-Si NP and  $\sim 0.091 \mu\text{mol}$  NOTA/mg NOTA-IR800-Si NP).

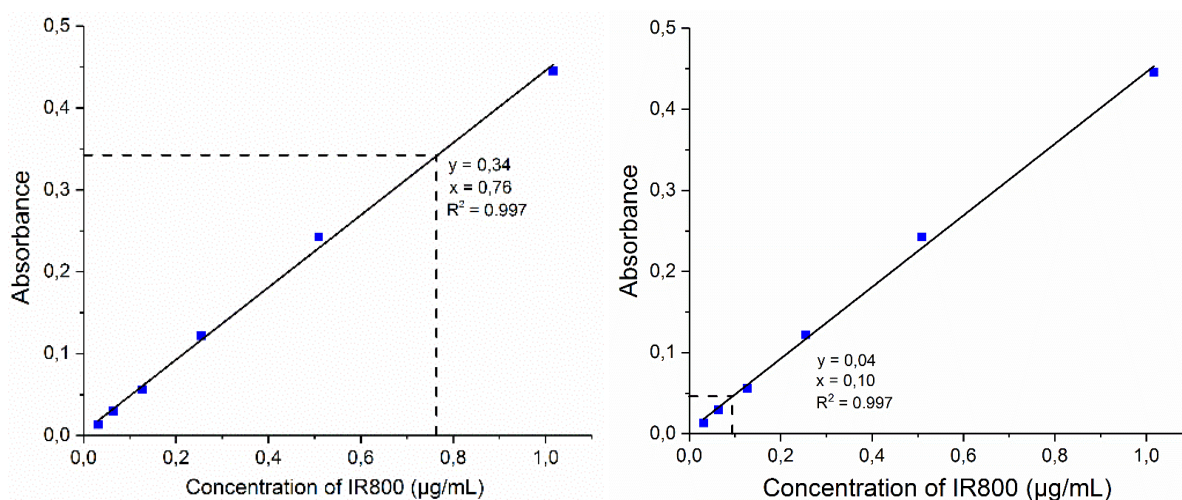

**Figure S5.** Quantification of IR800 dye present on IR800-Si NPs (left) and NOTA-IR800-Si NPs (right) by UV-Vis spectroscopy (Experimental value  $\sim 0.013 \mu\text{mol}$  IR800 dye/mg IR800-Si NP and  $\sim 0.010 \mu\text{mol}$  IR800/mg NOTA-IR800-Si NP).

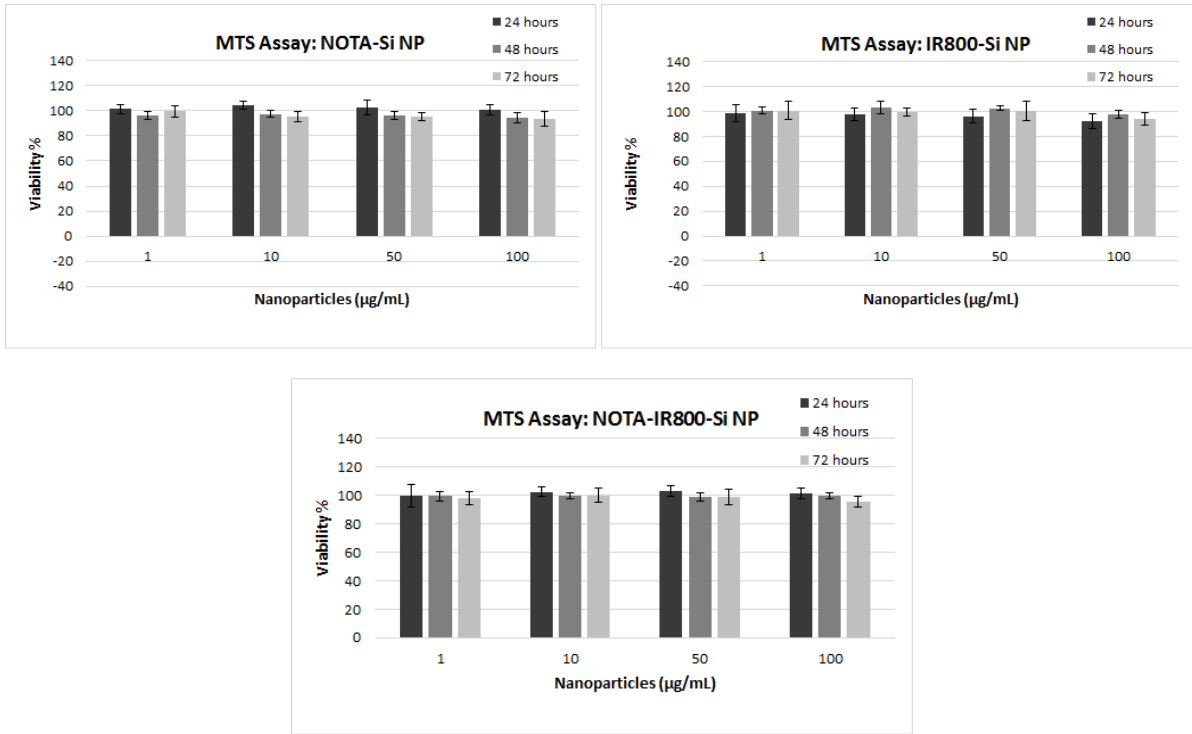

**Figure S6.** Effect of NOTA-Si NPs, IR800-Si NPs and NOTA-IR800-Si NPs on the viability of HEK293 cells. The cells were exposed to 1, 10, 50 and 100 µg/mL Si NPs dispersions for 24, 48 and 72 h respectively in Dulbecco's modified eagle's medium (DMEM) supplemented with 10% fetal bovine serum (FBS) and viability was determined using MTS assay. Triton-X was used as positive control.

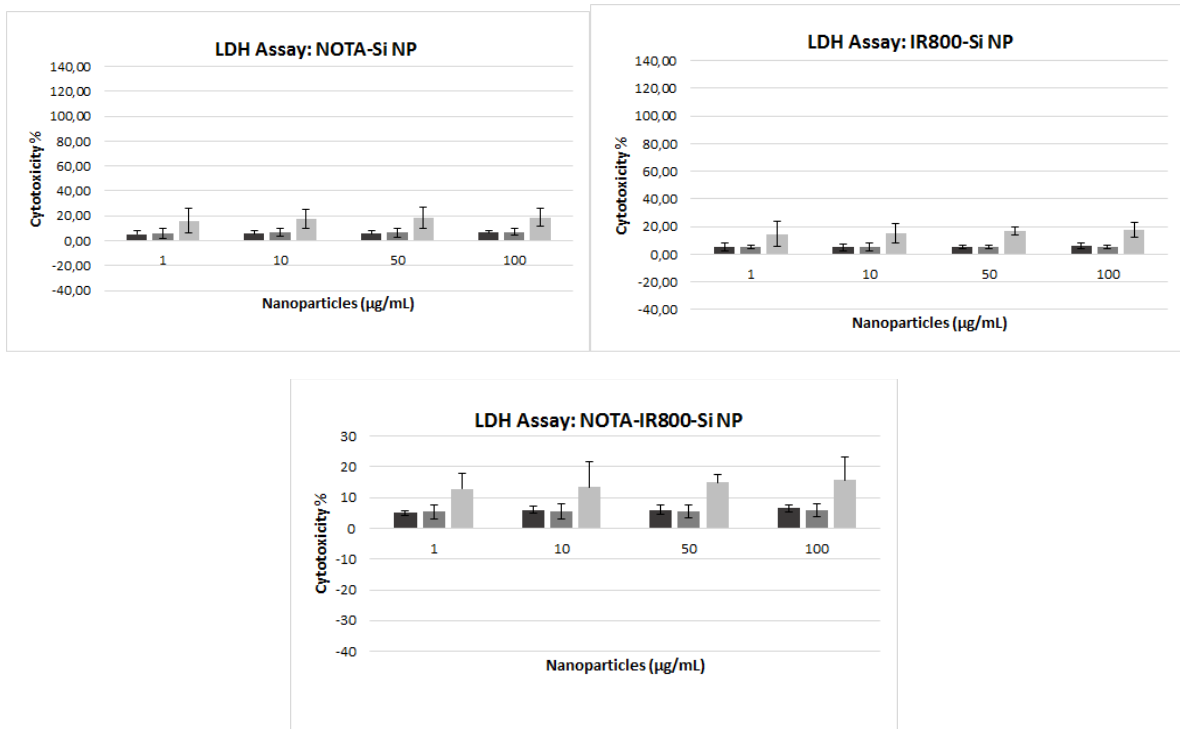

**Figure S7.** Effect of NOTA-Si NPs, IR800-Si NPs and NOTA-IR800-Si NPs on the viability of HEK293 cells. The cells were exposed to 1, 10, 50 and 100 µg/mL Si NPs dispersions for 24, 48 and 72 h respectively in Dulbecco's modified eagle's medium (DMEM) supplemented with 10% fetal bovine serum (FBS) and viability was determined using LDH assay. Lysis buffer for maximum LDH release was used as a positive control.
